# Supplementary material
Source: publisher site journal article supplement (https://www.dovepress.com/article/344110)
Supplement: Supplementary file 1 [file get_supplementary_file.php]

**Supplements**

**Supplement 1** The cerebrospinal fluid samples were classified into four grades according to the degree of blood contamination.


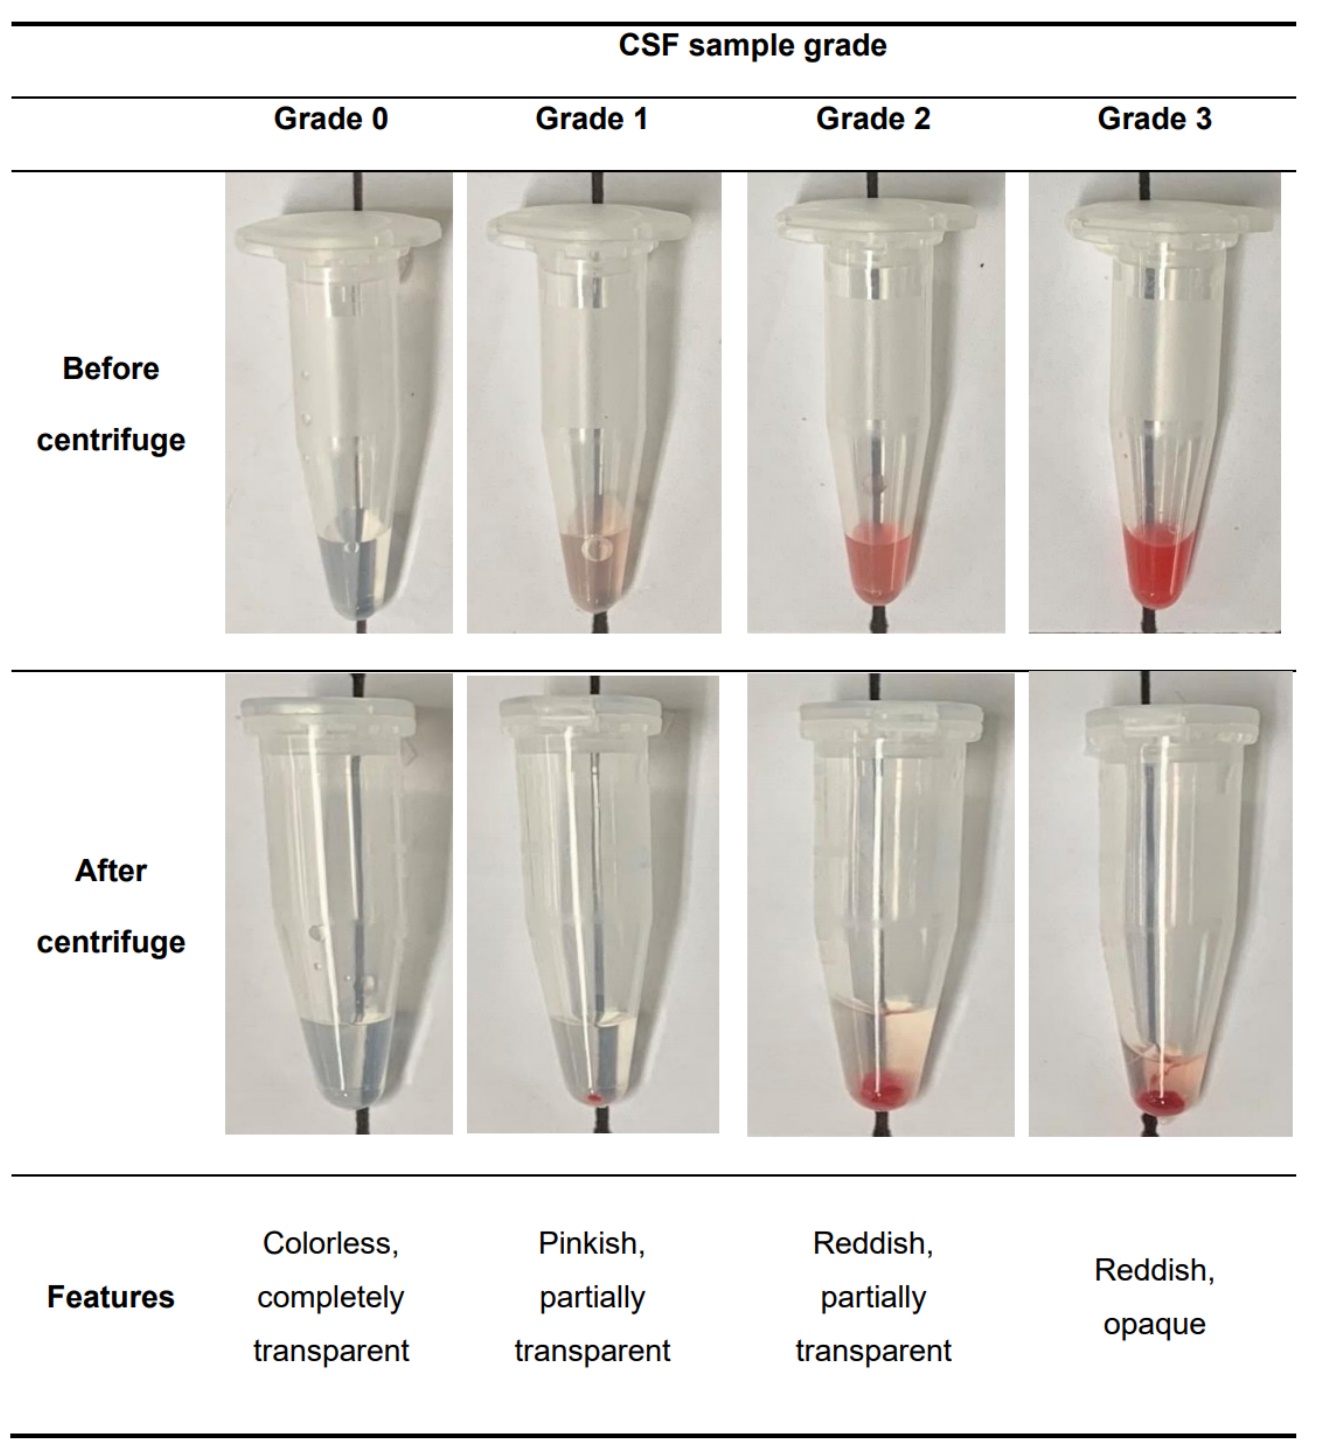


CSF, cerebrospinal fluid

**Supplement 2** Association between the degree of blood contamination and brain-derived neurotrophic factor level in group C

|  | **Degree of blood contamination** | | | | ***P*-value** |
| --- | --- | --- | --- | --- | --- |
|  | **Grade 0** | **Grade 1** | **Grade 2** | **Grade 3** |
| **Samples,** n (%) | 73 (47.7) | 39 (25.5) | 26 (17.0) | 15 (9.8) | - |
| **Sampling day,** n (%) |  |  |  |  | 0.708 |
| **POD 1** | 22 (30.1) | 16 (41.0) | 9 (34.6) | 3 (20.0) |  |
| **POD 7** | 27 (37.0) | 13 (33.3) | 7 (26.9) | 7 (46.7) |  |
| **POD 14** | 24 (32.9) | 10 (25.6) | 10 (38.5) | 5 (33.3) |  |
| **Weight (g),** mean (SEM) | 255.7 (4.0) | 242.8 (5.8) | 247.0 (8.0) | 242.9 (8.8) | 0.247 |
| **BDNF (pg/mL),** mean (SEM) | **8.6 (0.7)** | **10.5 (1.0)** | **13.1 (1.3)*** | **20.1 (3.0)*** | **<0.001** |

The cerebrospinal fluid samples were classified into four grades according to the degree of blood contamination: grade 0, colorless and completely transparent; grade 1, pinkish and partially transparent; grade 2, reddish and partially transparent; grade 3, reddish and opaque. The BDNF levels in grades 2 and 3 CSF samples were higher than those in grade 0 samples. The Conover test was performed for posthoc multiple comparisons. Also, the Jonckheere-Terpstra trend test revealed significantly higher BDNF levels with higher contamination grades (*P* < 0.001), and there was a moderate correlation between the BDNF level and the degree of blood contamination (Spearman’s correlation coefficient 0.397, *P* < 0.001). POD, postoperative day; SEM, standard error of the mean; BDNF, brain-derived neurotrophic factor. **P* < 0.05 compared to grade 0. Bold text; statistically significant data.
